# Supplementary material for: Structure, Functionality, Compatibility with Pesticides and Beneficial Microbes, and Potential Applications of a New Delivery System Based on Ink-Jet Technology
Source: MDPI journal article supplement (doi:10.3390/s23063053), 2023-03-12
Supplement: s1 [file s1]

**Figure S1.** Possible configuration of drop on demand thermal inkjet printheads.

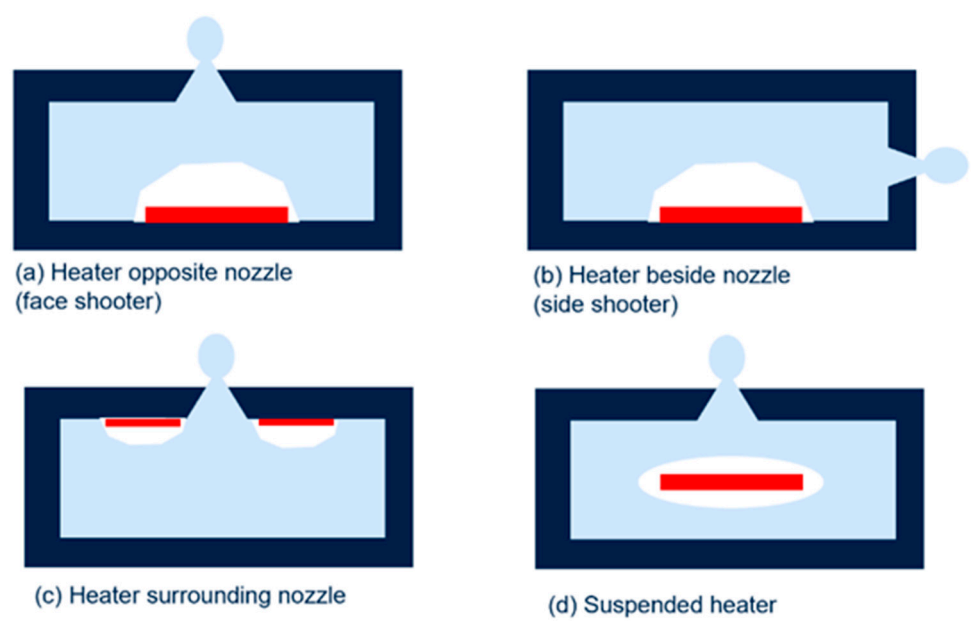

**Figure S2.** Representative images of the tests with abamectin and deltamethrin with *G. mellonella* and *S. carnaria*. The images show the 3.3 cm diameter Petri dishes hosting the *G. mellonella* larvae and the multi-well plate hosting the *S. carnaria* larvae.

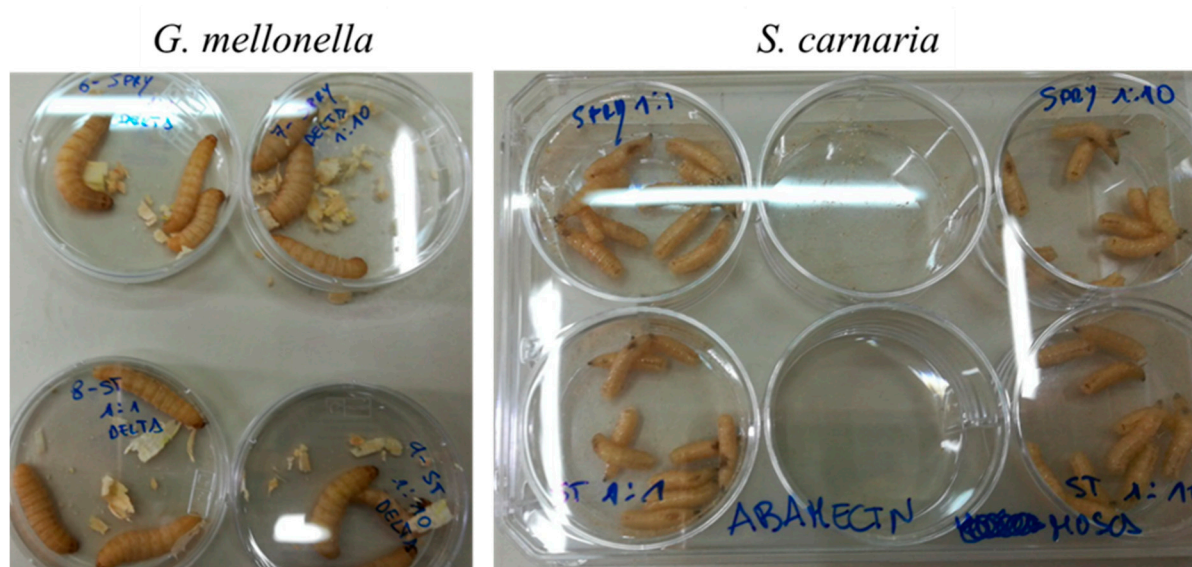

**Figure S3.** Image of the DEMO developed and used during experiments with beneficial microorganisms applied to different crops and cultivation systems. A: *Lactuca sativa* in pots; B: *Eruca vesicaria* in pot; C: *Eruca vesicaria* in squared petri dish.

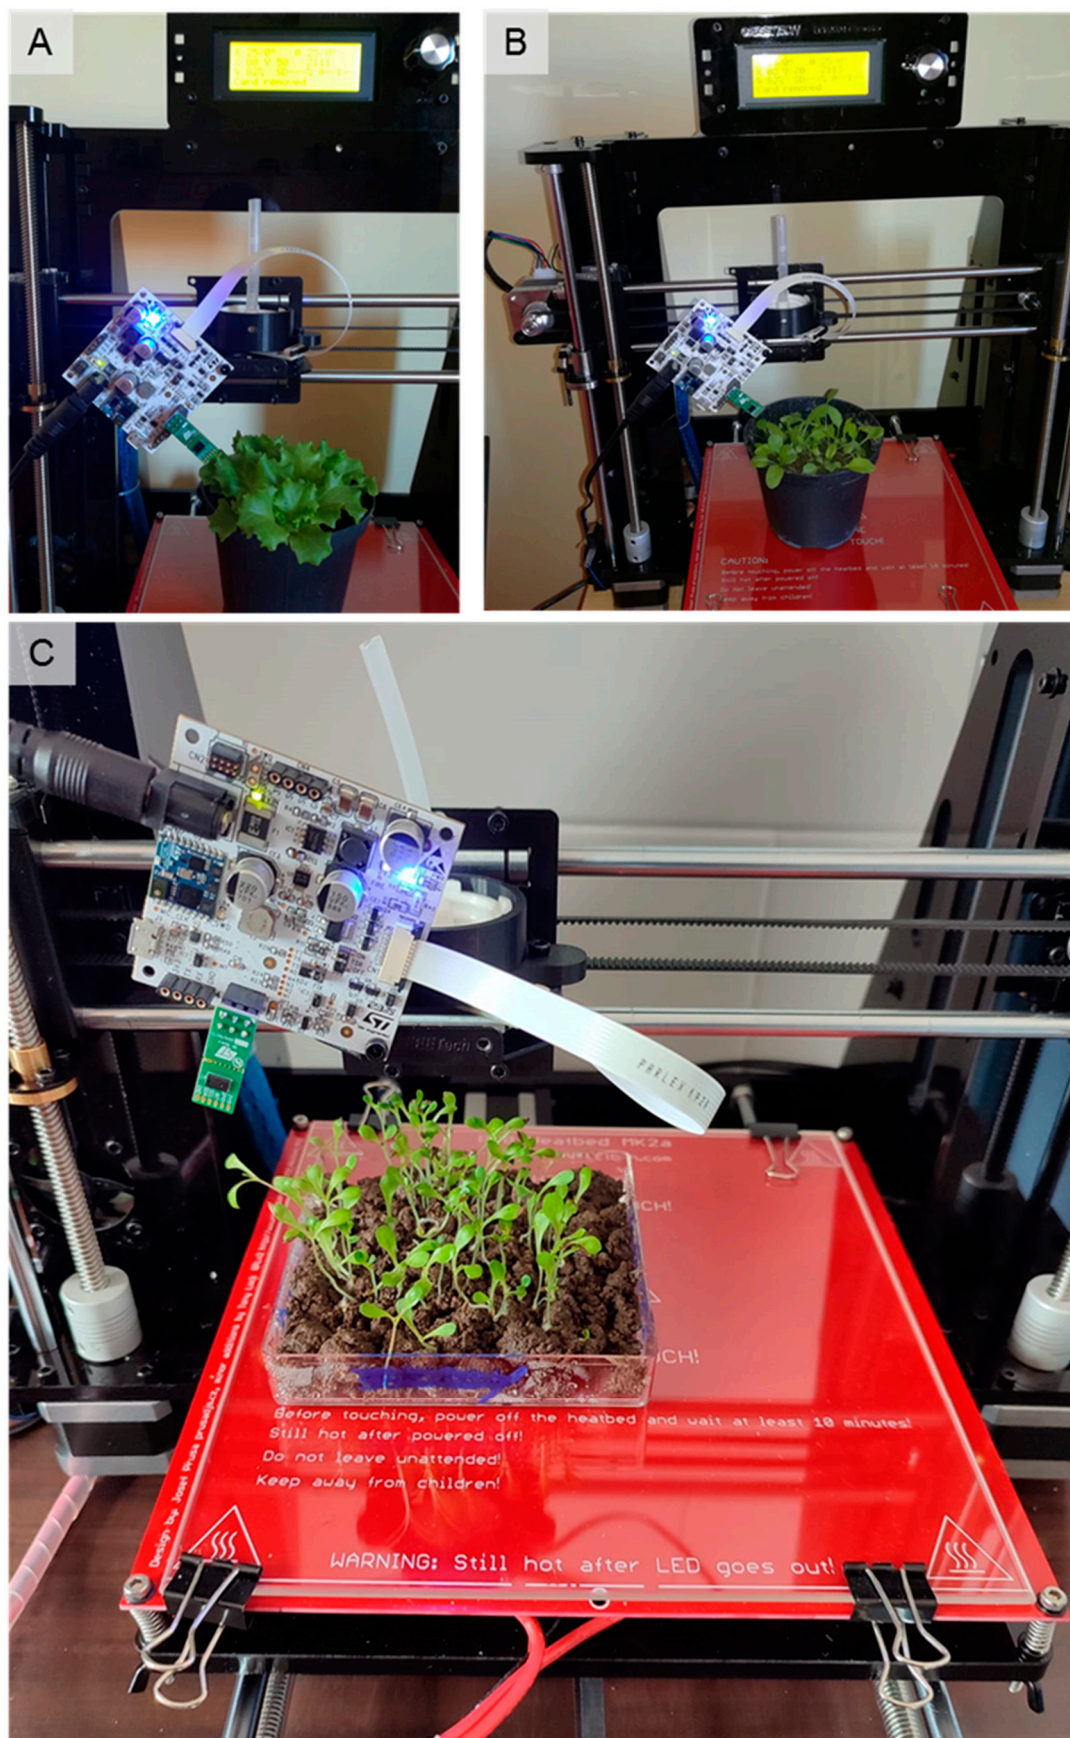

**Figure S4.** A, B. Examples of "paths" planned for the use of the DEMO applied to the cultivation of microgreens.

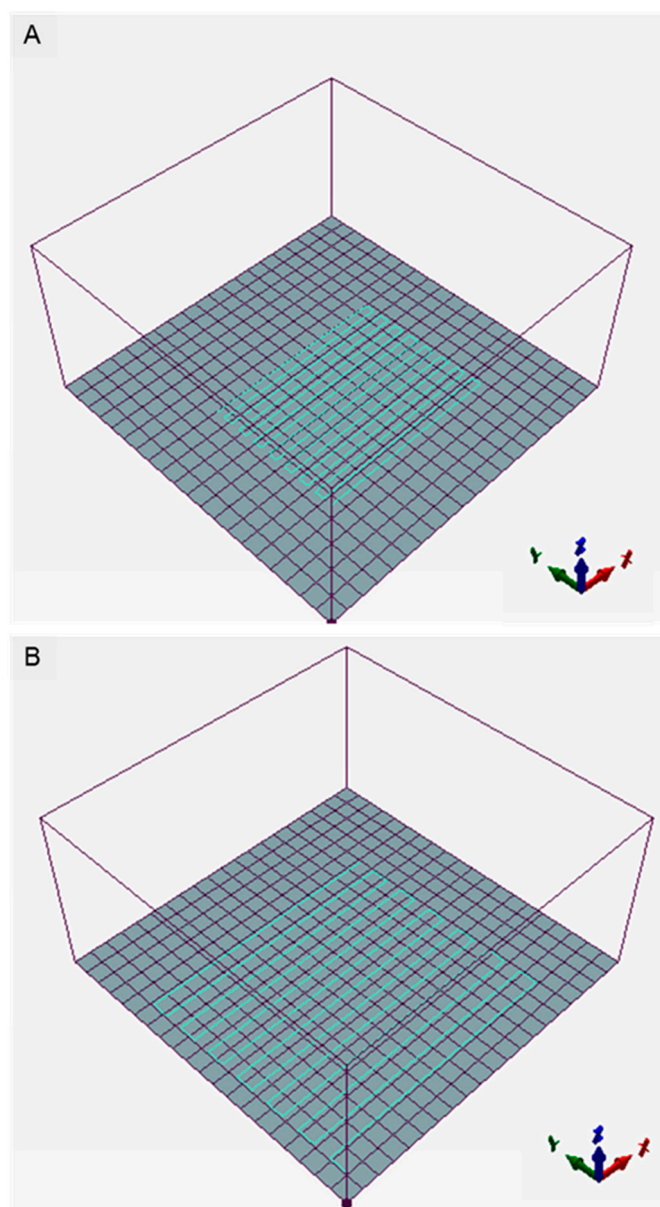

**Table S1.** List of microorganisms and type of viability test used.

| Microbial species              | Functional type                                                                                                                                     | Viability test                                                        |
|--------------------------------|-----------------------------------------------------------------------------------------------------------------------------------------------------|-----------------------------------------------------------------------|
| <i>Trichoderma harzianum</i>   | Fungus that belong to the Ascomycota division. Mycoparasitic and capable of inducing resistance in plants, it is widely used as a biocontrol agent. | Spore germination and spore production over agarized, solid substrate |
| <i>Coniothyrium minitans</i>   | Fungus that belong to the Ascomycota division. Mycoparasitic used as a biocontrol agent.                                                            | Spore germination and spore production over agarized, solid substrate |
| <i>Glomus mosseae</i>          | Fungus that belong to the Glomeromycota division. Capable of mycorrhizal interaction and used as a biostimulant and biocontrol agent.               | Spore germination                                                     |
| <i>Bacillus subtilis</i>       | Gram-positive bacterium belonging to the phylum Firmicutes. Widely used as a biocontrol agent.                                                      | Growth in liquid substrate                                            |
| <i>Pseudomonas fluorescens</i> | Gram-negative bacterium belonging to the phylum Proteobacteria. Widely used as a biocontrol agent.                                                  | Growth in liquid substrate                                            |

**Table S2.** List of herbicides, assay plants and concentrations used. The concentrations are reported in  $\mu\text{l ml}^{-1}$ , differently from what is reported on the label for most plant protection products ( $1 \text{ ha}^{-1}$ ).

| Active compound and commercial name | Plant species            | Concentration                                                                                                                             |
|-------------------------------------|--------------------------|-------------------------------------------------------------------------------------------------------------------------------------------|
| Glifosate (Clinic 360)              | <i>Lolium temulentum</i> | 30 $\mu\text{l ml}^{-1}$<br>10 $\mu\text{l ml}^{-1}$<br>3 $\mu\text{l ml}^{-1}$<br>1 $\mu\text{l ml}^{-1}$<br>0.3 $\mu\text{l ml}^{-1}$   |
| Glifosate (Clinic 360)              | <i>Avena fatua</i>       | 30 $\mu\text{l ml}^{-1}$<br>10 $\mu\text{l ml}^{-1}$<br>3 $\mu\text{l ml}^{-1}$<br>1 $\mu\text{l ml}^{-1}$<br>0.3 $\mu\text{l ml}^{-1}$   |
| Cicloxidim (Stratos)                | <i>Lolium temulentum</i> | 10 $\mu\text{l ml}^{-1}$<br>3 $\mu\text{l ml}^{-1}$<br>1 $\mu\text{l ml}^{-1}$<br>0.3 $\mu\text{l ml}^{-1}$<br>0.1 $\mu\text{l ml}^{-1}$  |
| Cicloxidim (Stratos)                | <i>Avena fatua</i>       | 10 $\mu\text{l ml}^{-1}$<br>30 $\mu\text{l ml}^{-1}$<br>1 $\mu\text{l ml}^{-1}$<br>0.3 $\mu\text{l ml}^{-1}$<br>0.1 $\mu\text{l ml}^{-1}$ |

**Table S3.** List of insecticides, species of insects tested, and concentrations used. The concentrations are reported in  $\mu\text{l ml}^{-1}$ , differently from what is reported on the label for most plant protection products ( $1 \text{ ha}^{-1}$ ).

| Active compound and commercial name | Insect species             | Concentration                                                                                                                                     |
|-------------------------------------|----------------------------|---------------------------------------------------------------------------------------------------------------------------------------------------|
| Abamectine (VERTIMEC)               | <i>Galleria mellonella</i> | $1 \mu\text{l ml}^{-1}$<br>$0.3 \mu\text{l ml}^{-1}$<br>$0.1 \mu\text{l ml}^{-1}$<br>$0.03 \mu\text{l ml}^{-1}$<br>$0.01 \mu\text{l ml}^{-1}$     |
| Abamectine (VERTIMEC)               | <i>Sarcophaga carnaria</i> | $1 \mu\text{l ml}^{-1}$<br>$0.3 \mu\text{l ml}^{-1}$<br>$0.1 \mu\text{l ml}^{-1}$<br>$0.03 \mu\text{l ml}^{-1}$<br>$0.01 \mu\text{l ml}^{-1}$     |
| Deltametrine (DECIS)                | <i>Galleria mellonella</i> | $0.6 \mu\text{l ml}^{-1}$<br>$0.1 \mu\text{l ml}^{-1}$<br>$0.06 \mu\text{l ml}^{-1}$<br>$0.01 \mu\text{l ml}^{-1}$<br>$0.006 \mu\text{l ml}^{-1}$ |
| Deltametrine (DECIS)                | <i>Sarcophaga carnaria</i> | $0.6 \mu\text{l ml}^{-1}$<br>$0.1 \mu\text{l ml}^{-1}$<br>$0.06 \mu\text{l ml}^{-1}$<br>$0.01 \mu\text{l ml}^{-1}$<br>$0.006 \mu\text{l ml}^{-1}$ |

**Table S4.** List of beneficial microbes, plants assays and concentrations used. Concentrations are reported as colony forming units (CFU) per mL of product.

| Beneficial microbe and commercial name    | Biological activity                                    | Plant species          | Concentration                                                                                                                                                                              |
|-------------------------------------------|--------------------------------------------------------|------------------------|--------------------------------------------------------------------------------------------------------------------------------------------------------------------------------------------|
| <i>Trichoderma harzianum</i><br>(SAMAGRI) | Biostimulant, mycoparasite,<br>induce plant resistance | <i>Lolium perenne</i>  | 1x10 <sup>7</sup> ml <sup>-1</sup><br>1x10 <sup>6</sup> ml <sup>-1</sup><br>1x10 <sup>5</sup> ml <sup>-1</sup><br>1x10 <sup>4</sup> ml <sup>-1</sup><br>1x10 <sup>3</sup> ml <sup>-1</sup> |
| <i>Trichoderma harzianum</i><br>(SAMAGRI) | Biostimulant, mycoparasite,<br>induce plant resistance | <i>Eruca vesicaria</i> | 1x10 <sup>7</sup> ml <sup>-1</sup><br>1x10 <sup>6</sup> ml <sup>-1</sup><br>1x10 <sup>5</sup> ml <sup>-1</sup><br>1x10 <sup>4</sup> ml <sup>-1</sup><br>1x10 <sup>3</sup> ml <sup>-1</sup> |
| <i>Bacillus subtilis</i><br>(SERENADE)    | Biostimulant and biocontrol                            | <i>Lolium perenne</i>  | 1x10 <sup>7</sup> ml <sup>-1</sup><br>1x10 <sup>6</sup> ml <sup>-1</sup><br>1x10 <sup>5</sup> ml <sup>-1</sup><br>1x10 <sup>4</sup> ml <sup>-1</sup><br>1x10 <sup>3</sup> ml <sup>-1</sup> |
| <i>Bacillus subtilis</i><br>(SERENADE)    | Biostimulant and biocontrol                            | <i>Eruca vesicaria</i> | 1x10 <sup>7</sup> ml <sup>-1</sup><br>1x10 <sup>6</sup> ml <sup>-1</sup><br>1x10 <sup>5</sup> ml <sup>-1</sup><br>1x10 <sup>4</sup> ml <sup>-1</sup><br>1x10 <sup>3</sup> ml <sup>-1</sup> |

**Table S5.** List of treatments and variables considered in the first experiment with hydrosensitive papers sheet.

| Sprayer system | Liquid | Height of application |
|----------------|--------|-----------------------|
| ST20           | Water  | 10 cm                 |
| ST50           | Water  | 10 cm                 |
| Spray          | Water  | 10 cm                 |

**Table S6.** List of variables included in the experiment with beneficial microorganisms on microgreens. The concentrations of the fungus *Trichoderma harzianum* are reported as colony forming units (CFU) per ml of commercial product.

| Beneficial microbe and commercial name | Sprayer system | Height of application | Plant species                                   | Concentration                      |
|----------------------------------------|----------------|-----------------------|-------------------------------------------------|------------------------------------|
| <i>Trichoderma harzianum</i> (SAMAGRI) | ST20           | 10, 15, 20 cm         | <i>Eruca vesicaria</i><br><i>Lactuca sativa</i> | 1x10 <sup>5</sup> ml <sup>-1</sup> |
| <i>Trichoderma harzianum</i> (SAMAGRI) | ST50           | 10, 15, 20 cm         | <i>Eruca vesicaria</i><br><i>Lactuca sativa</i> | 1x10 <sup>5</sup> ml <sup>-1</sup> |
| <i>Trichoderma harzianum</i> (SAMAGRI) | Spray          | 10, 15, 20 cm         | <i>Eruca vesicaria</i><br><i>Lactuca sativa</i> | 1x10 <sup>5</sup> ml <sup>-1</sup> |
